# Supplementary material for: Umbelliferone-Based Fluorescent Probe for Selective Recognition of Hydrogen Sulfide and Its Bioimaging in Living Cells and Zebrafish
Source: MDPI journal article supplement (doi:10.3390/chemosensors10100427), 2022-10-17
Supplement: s1 [file s1]

## Supporting Information

### Umbelliferone-based fluorescent probe for selective recognition of hydrogen sulfide and its bio-imaging in living cells and zebrafish

#### 1. NMR and ESI-HRMS Spectra

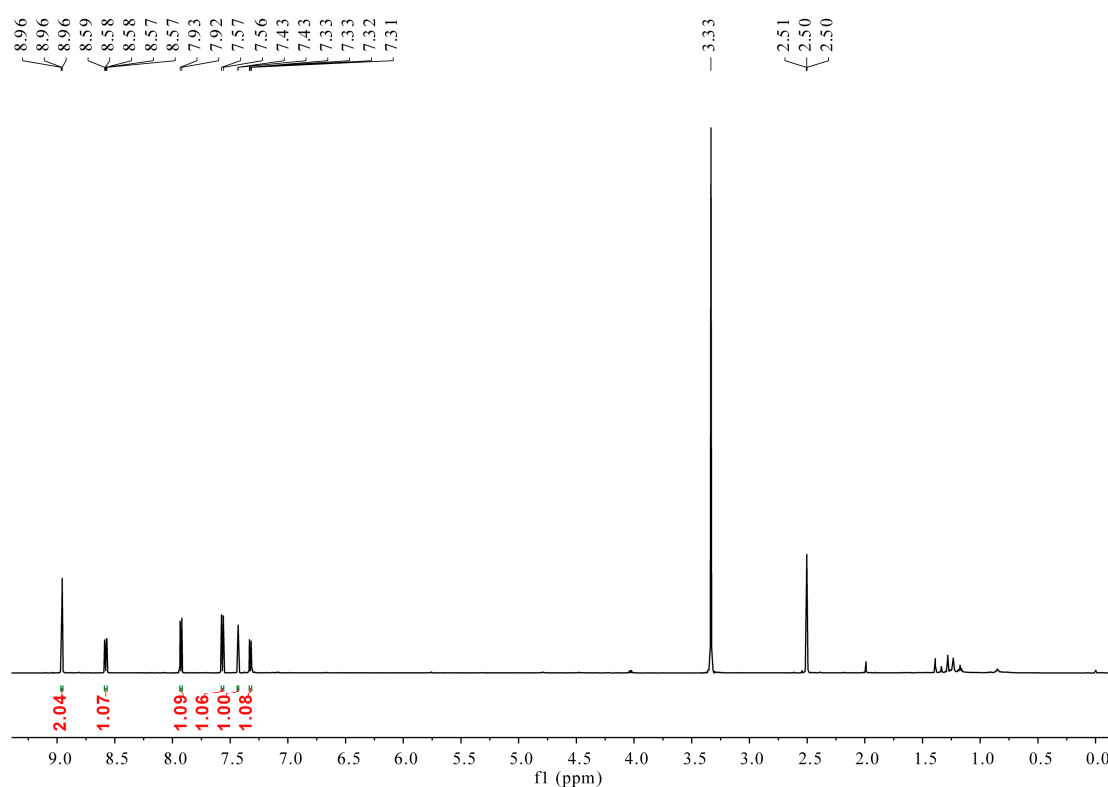

**Figure S1.** <sup>1</sup>H NMR spectrum (600 MHz, DMSO-*d*<sub>6</sub>) of **1** at 298 K.

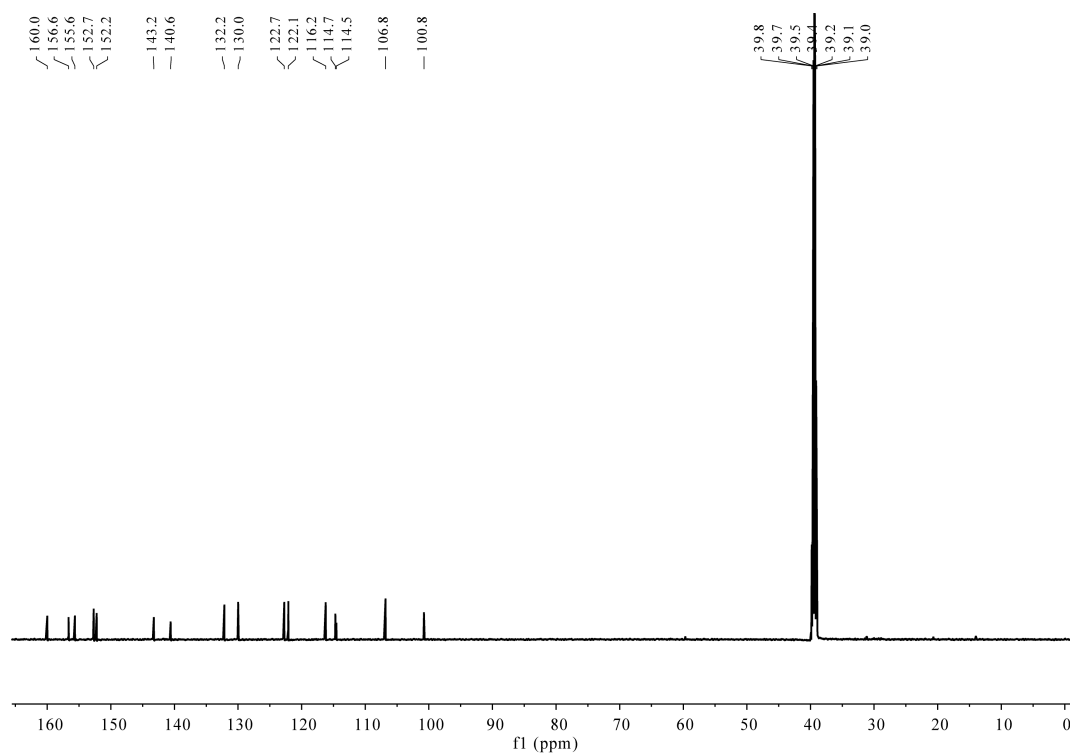

**Figure S2.**  $^{13}\text{C}$  NMR spectrum (151 MHz,  $\text{CDCl}_3$ ) of **1** at 298 K.

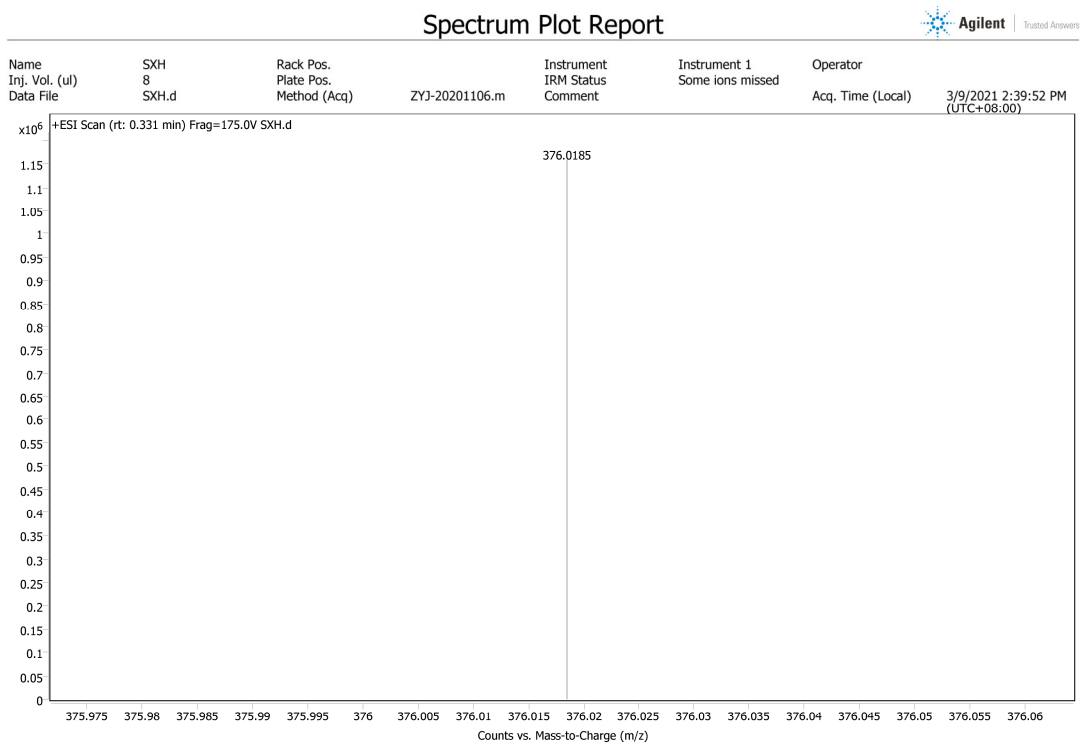

**Figure S3.** ESI-HRMS spectrum of **1**.

S #2685 RT: 8.75 AV: 1 NL: 3.09E8

F: FTMS - p ESI d Full ms2 186.0194@hcd15.00 [50.0000-210.0000]

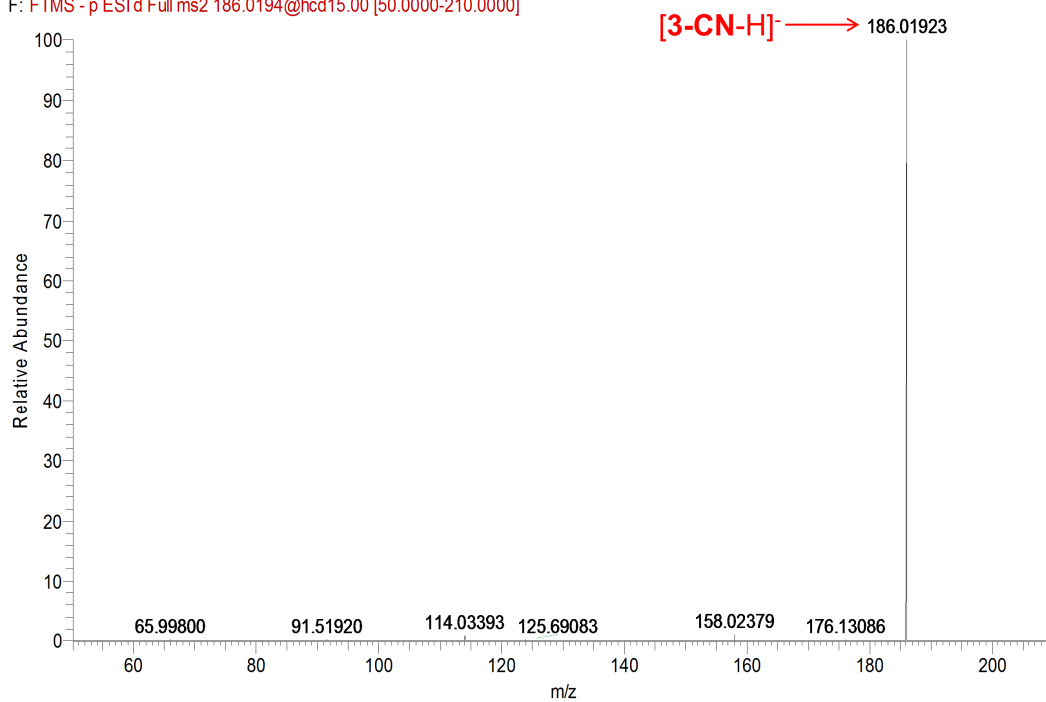

**Figure S4.** ESI-HRMS spectrum of the mixture of **1** and H<sub>2</sub>S.
